# Supplementary material for: A biclustering algorithm based on a Bicluster Enumeration Tree: application to DNA microarray data
Source: Springer Nature journal article supplement (doi:10.1186/1756-0381-2-9), 2009-12-01
Supplement: 13040_2009_21_MOESM2_ESM.pdf [file 13040_2009_21_MOESM2_ESM.pdf]

|   |   |   |   |
|---|---|---|---|
| 1 | 1 | 1 | 1 |
| 1 | 1 | 1 | 1 |
| 1 | 1 | 1 | 1 |
| 1 | 1 | 1 | 1 |
| 1 | 1 | 1 | 1 |

 $M_1$ 

|   |   |   |   |
|---|---|---|---|
| 1 | 1 | 1 | 1 |
| 2 | 2 | 2 | 2 |
| 3 | 3 | 3 | 3 |
| 4 | 4 | 4 | 4 |
| 5 | 5 | 5 | 5 |

 $M_2$ 

|   |   |   |   |
|---|---|---|---|
| 1 | 2 | 3 | 4 |
| 1 | 2 | 3 | 4 |
| 1 | 2 | 3 | 4 |
| 1 | 2 | 3 | 4 |
| 1 | 2 | 3 | 4 |

 $M_3$ 

|   |   |    |   |
|---|---|----|---|
| 1 | 2 | 5  | 0 |
| 2 | 3 | 6  | 1 |
| 4 | 5 | 8  | 3 |
| 5 | 6 | 9  | 4 |
| 6 | 7 | 10 | 5 |

 $M_4$ 

|   |    |     |     |
|---|----|-----|-----|
| 1 | 2  | 0.5 | 1.5 |
| 2 | 4  | 1   | 3   |
| 4 | 8  | 2   | 6   |
| 3 | 6  | 1.5 | 4.5 |
| 5 | 10 | 2.5 | 7.5 |

 $M_5$ 

|    |    |     |     |
|----|----|-----|-----|
| 10 | 20 | 5   | 15  |
| 2  | 4  | 1   | 3   |
| 4  | 8  | 2   | 6   |
| 3  | 6  | 1.5 | 4.5 |
| 5  | 10 | 2.5 | 7.5 |

 $M_6$ 

|    |    |    |    |
|----|----|----|----|
| 70 | 13 | 19 | 10 |
| 49 | 40 | 49 | 35 |
| 40 | 20 | 27 | 15 |
| 90 | 15 | 20 | 12 |
| 50 | 38 | 45 | 30 |

 $M_7$
