# Supplementary material for: A biclustering algorithm based on a Bicluster Enumeration Tree: application to DNA microarray data
Source: Springer Nature journal article supplement (doi:10.1186/1756-0381-2-9), 2009-12-01
Supplement: 13040_2009_21_MOESM9_ESM.pdf [file 13040_2009_21_MOESM9_ESM.pdf]

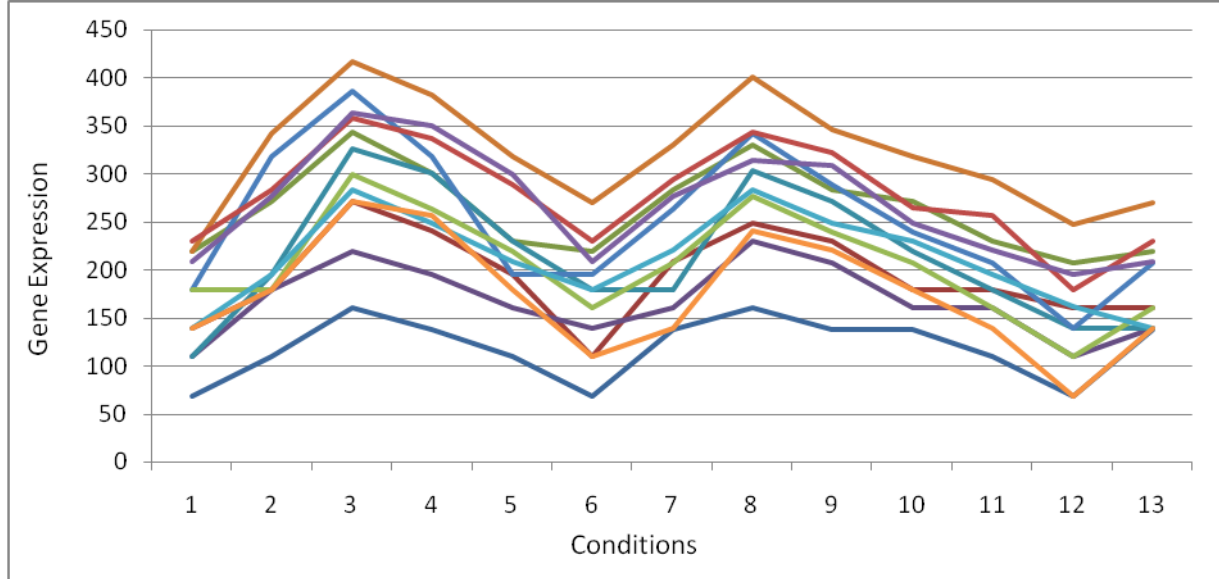

(a)

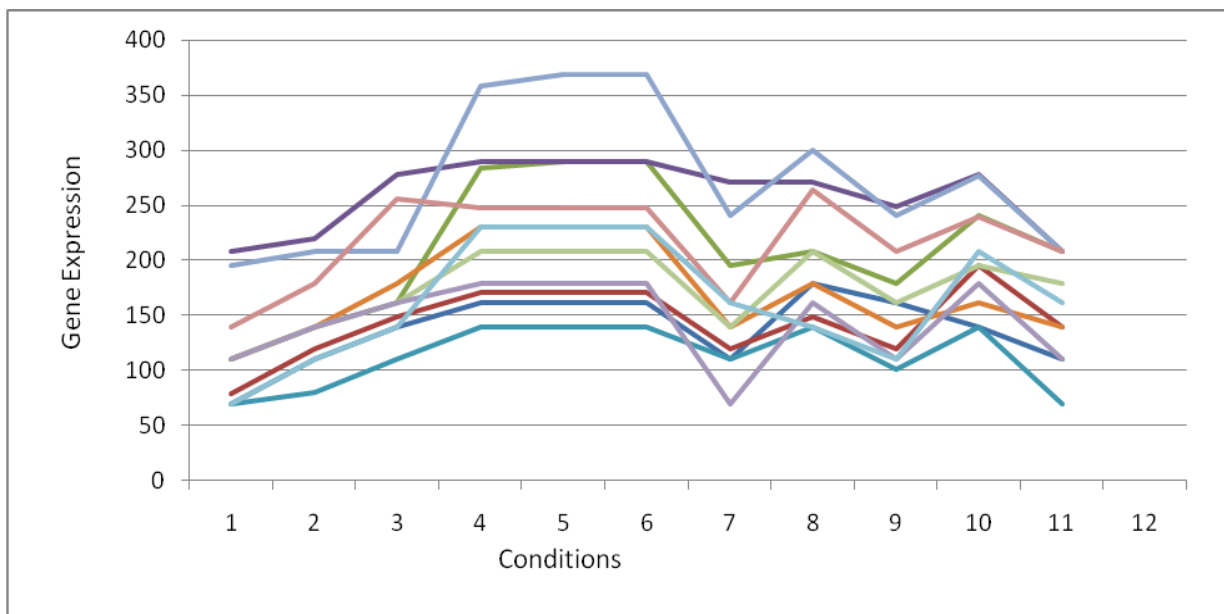

(b)
