# Supplementary figures and images for: A biclustering algorithm based on a Bicluster Enumeration Tree: application to DNA microarray data
Source: Springer Nature journal article supplement (doi:10.1186/1756-0381-2-9), 2009-12-01

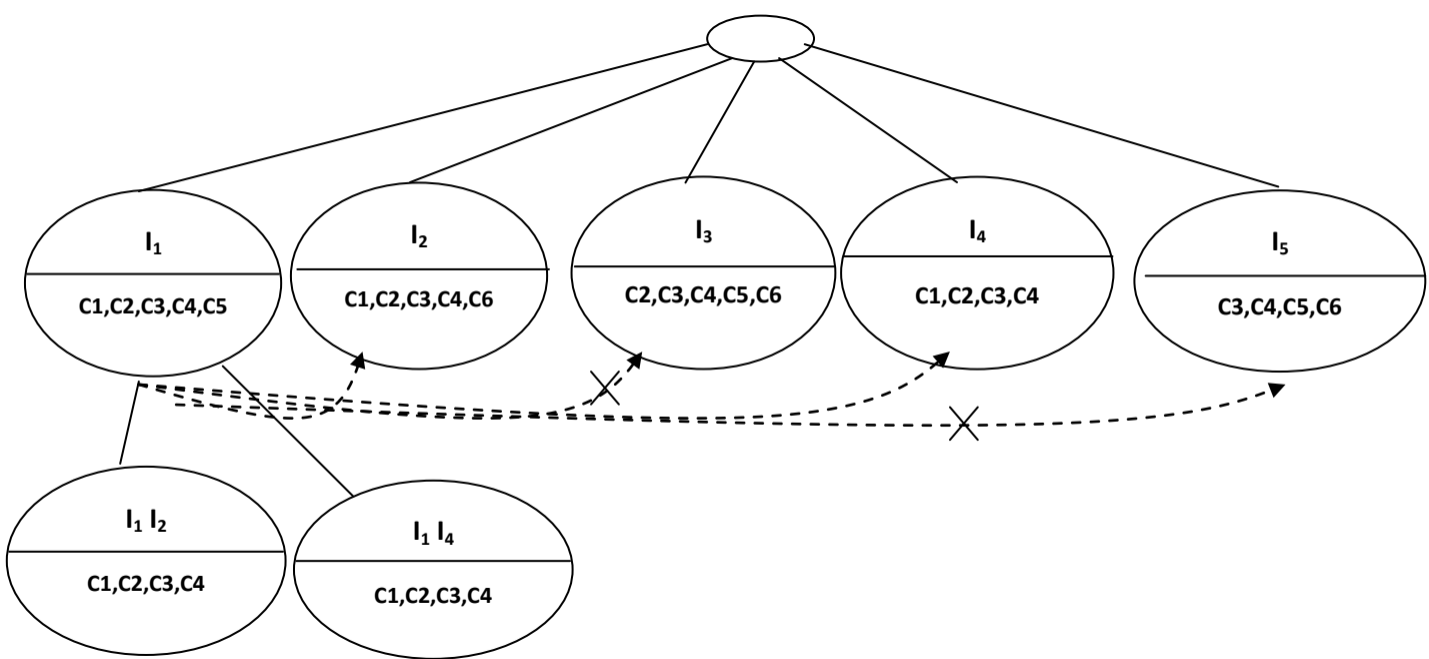

Supplement: 13040_2009_21_MOESM5_ESM.pdf [file 13040_2009_21_MOESM5_ESM.pdf]

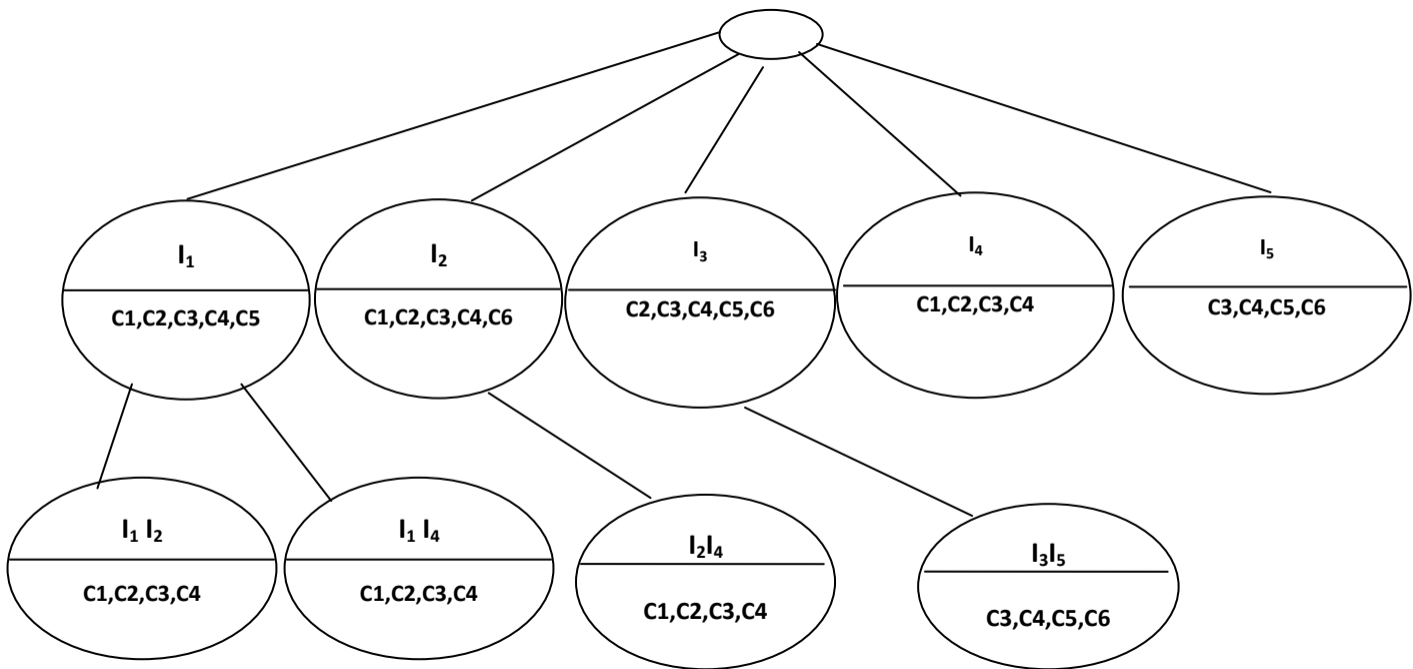

Supplement: 13040_2009_21_MOESM6_ESM.pdf [file 13040_2009_21_MOESM6_ESM.pdf]

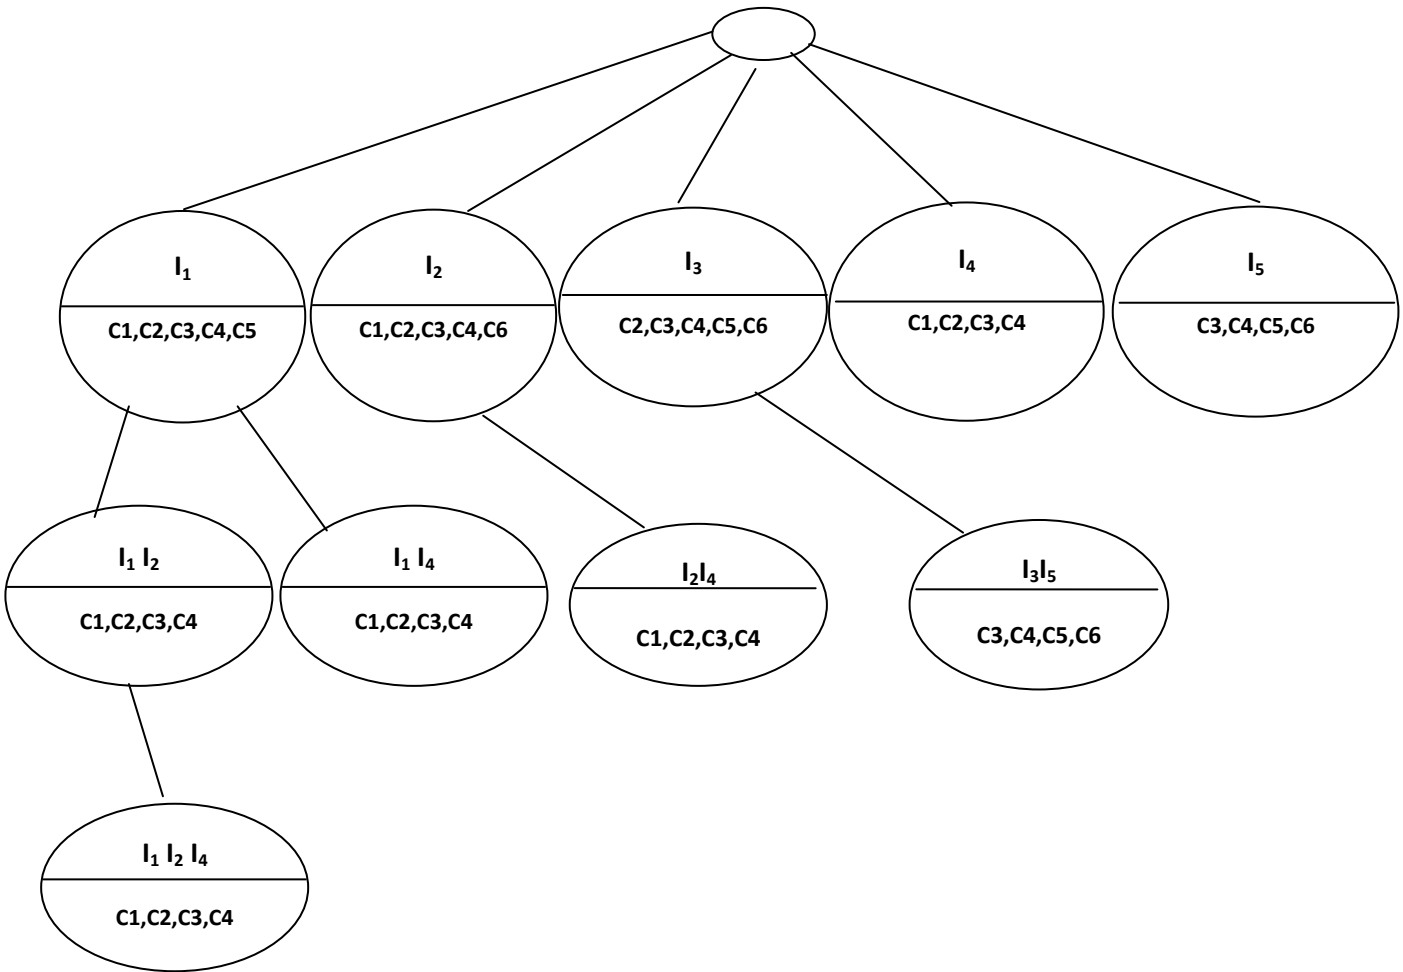

Supplement: 13040_2009_21_MOESM7_ESM.pdf [file 13040_2009_21_MOESM7_ESM.pdf]
